# Supplementary material
Source: PubMed Central journal article supplement (PMC4982940)
Supplement: mmc1.pdf [file mmc1.pdf]

**Biophysical Journal, Volume 111**

**Supplemental Information**

**Structure of an Intrinsically Disordered Stress Protein Alone and Bound  
to a Membrane Surface**

**John Atkinson, Matthew W. Clarke, Josephine M. Warnica, Kelly F.  
Boddington, and Steffen P. Graether**

**Figure S1**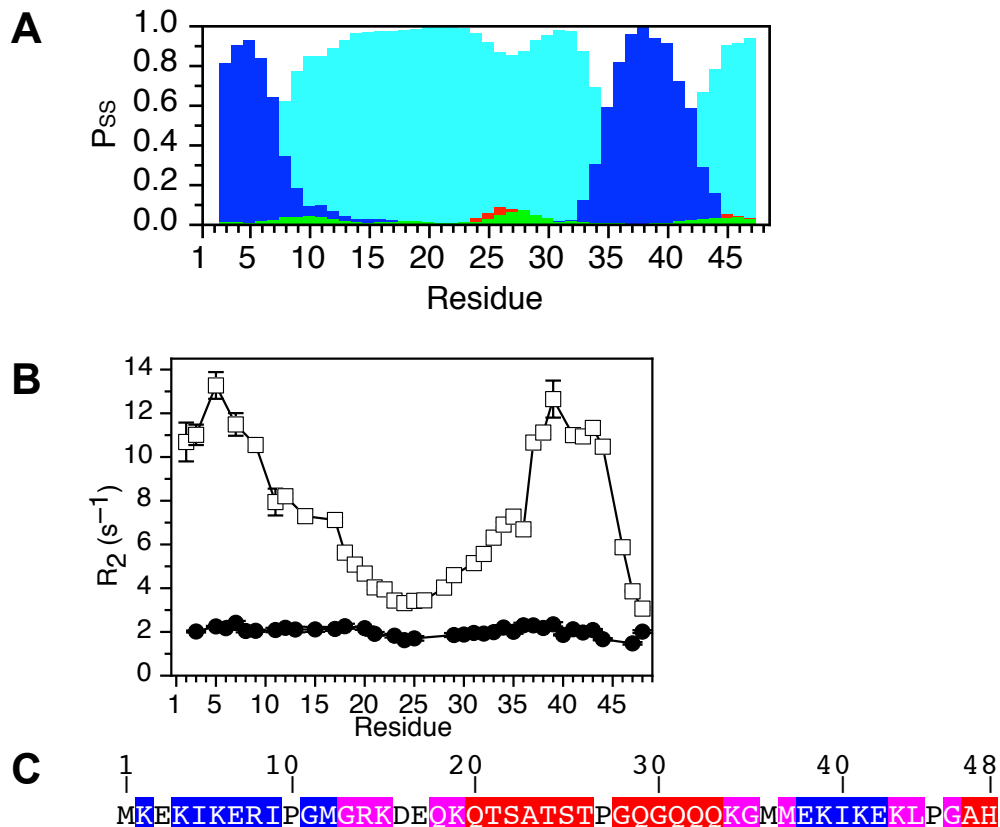

Figure S1. Multiple lines of evidence show that the K-segment binds to the micelle. A)  $\delta 2\Delta$  analysis of K2 chemical shifts in the presence of SDS micelles. Coil, light blue;  $\alpha$ -helix, dark blue;  $\beta$ -strand, red; poly-proline type II helix, green. B)  $R_2$  relaxation data of K2 in the absence (closed circles) and presence (open squares) of SDS micelles. C) Map of residues undergoing chemical shift change at the different exchange rates. Slow exchange, blue; Intermediate exchange, pink; fast exchange, red. Residues shown in white are residues for which insufficient assignments were available (i.e. proline residues or overlapped resonances). This research for all panels was originally published in the Journal of Biological Chemistry. Clarke et al. (2015) J. Biol. Chem. 290: 26900–26913. © The American Society for Biochemistry and Molecular Biology.
